# Supplementary material for: Theoretical investigation of gas-phase molecular complex formation between 2-hydroxy thiophenol and a water molecule
Source: Royal Society of Chemistry journal article supplement (doi:10.1039/c6cp08442g), 2016-12-20
Supplement: c6cp08442g1.pdf [file c6cp08442g1.pdf]

Supplementary Material

Theoretical investigation of gas-phase molecular complex formation between  
2-hydroxy thiophenol and a water molecule

Debojit Kumar Deb and Biplab Sarkar\*

*Department of Chemistry, Centre for Advanced Studies, North-Eastern Hill University,  
Shillong 793022, India*

**Z-matrix coordinates in Å of the optimized conformers, transition-states and complexes from MP2/aug-cc-pVTZ calculation.**

SG

|   |   |            |   |              |   |               |
|---|---|------------|---|--------------|---|---------------|
| C |   |            |   |              |   |               |
| C | 1 | 1.40310446 |   |              |   |               |
| C | 2 | 1.39502054 | 1 | 119.51404510 |   |               |
| C | 3 | 1.39005402 | 2 | 120.04551987 | 1 | 0.46917289    |
| C | 4 | 1.39562825 | 3 | 120.59338154 | 2 | 0.14373714    |
| C | 5 | 1.39092495 | 4 | 119.59161842 | 3 | -0.21107258   |
| S | 1 | 1.78318322 | 6 | 120.99558884 | 5 | 177.87203025  |
| H | 7 | 1.34132128 | 1 | 96.85906171  | 6 | 97.20498830   |
| O | 2 | 1.35684633 | 1 | 122.25348099 | 6 | 179.38000053  |
| H | 9 | 0.97336420 | 2 | 106.64098142 | 1 | -4.03281685   |
| H | 3 | 1.08182359 | 2 | 118.58189670 | 1 | -179.76824933 |
| H | 4 | 1.08200893 | 3 | 119.34804409 | 2 | 179.90905602  |
| H | 5 | 1.08132941 | 4 | 120.40190075 | 3 | 179.66824142  |
| H | 6 | 1.08203765 | 5 | 120.97407169 | 4 | 179.79779787  |

SA

|   |   |            |   |              |   |               |
|---|---|------------|---|--------------|---|---------------|
| C |   |            |   |              |   |               |
| C | 1 | 1.40035997 |   |              |   |               |
| C | 2 | 1.39284967 | 1 | 120.13645847 |   |               |
| C | 3 | 1.39277714 | 2 | 120.48432535 | 1 | 0.00000000    |
| C | 4 | 1.39310759 | 3 | 119.71075399 | 2 | 0.00027206    |
| C | 5 | 1.39198137 | 4 | 119.82758166 | 3 | 0.00000000    |
| S | 1 | 1.76446820 | 6 | 118.87267474 | 5 | -179.99804515 |
| H | 7 | 1.33718403 | 1 | 95.74588396  | 6 | -179.99144184 |
| O | 2 | 1.37068020 | 1 | 117.47909745 | 6 | 180.00000000  |
| H | 9 | 0.96456052 | 2 | 108.56767199 | 1 | -179.99600583 |
| H | 3 | 1.08471686 | 2 | 119.24439756 | 1 | -180.00000000 |
| H | 4 | 1.08151709 | 3 | 119.68394073 | 2 | -180.00000000 |
| H | 5 | 1.08144922 | 4 | 120.40188577 | 3 | 179.99974032  |
| H | 6 | 1.08315633 | 5 | 120.18601341 | 4 | 179.99895492  |

## AA

|   |   |            |   |              |   |               |
|---|---|------------|---|--------------|---|---------------|
| C |   |            |   |              |   |               |
| C | 1 | 1.40011629 |   |              |   |               |
| C | 2 | 1.39207387 | 1 | 120.37309299 |   |               |
| C | 3 | 1.39326367 | 2 | 120.25096272 | 1 | 0.00000000    |
| C | 4 | 1.39287091 | 3 | 119.74285535 | 2 | 0.00000000    |
| C | 5 | 1.39316518 | 4 | 119.96224645 | 3 | 0.00000000    |
| S | 1 | 1.76737062 | 6 | 123.91526239 | 5 | -180.00000000 |
| H | 7 | 1.33809351 | 1 | 94.66544288  | 6 | 0.00000000    |
| O | 2 | 1.36753452 | 1 | 116.40244718 | 6 | 180.00000000  |
| H | 9 | 0.96448484 | 2 | 108.89511863 | 1 | 180.00000000  |
| H | 3 | 1.08452410 | 2 | 119.32883730 | 1 | -180.00000000 |
| H | 4 | 1.08152183 | 3 | 119.71496495 | 2 | 180.00000000  |
| H | 5 | 1.08152093 | 4 | 120.38615757 | 3 | 180.00000000  |
| H | 6 | 1.08301661 | 5 | 119.93678289 | 4 | 180.00000000  |

TS'<sub>SG-SG</sub>

|   |   |            |   |              |   |               |
|---|---|------------|---|--------------|---|---------------|
| C |   |            |   |              |   |               |
| C | 1 | 1.40147145 |   |              |   |               |
| C | 2 | 1.39290422 | 1 | 119.89660784 |   |               |
| C | 3 | 1.39033462 | 2 | 120.36169363 | 1 | 0.00000000    |
| C | 4 | 1.39429069 | 3 | 120.00720269 | 2 | 0.00000000    |
| C | 5 | 1.39101449 | 4 | 119.81371713 | 3 | 0.00000000    |
| S | 1 | 1.77157423 | 6 | 123.07205310 | 5 | -180.00000000 |
| H | 7 | 1.33604102 | 1 | 95.97531560  | 6 | -0.00080208   |
| O | 2 | 1.36627261 | 1 | 123.10003281 | 6 | 180.00000000  |
| H | 9 | 0.96556941 | 2 | 110.20513507 | 1 | 0.00000000    |
| H | 3 | 1.08192531 | 2 | 118.14880600 | 1 | -180.00000000 |
| H | 4 | 1.08151386 | 3 | 119.64004022 | 2 | -180.00000000 |
| H | 5 | 1.08145823 | 4 | 120.52188640 | 3 | 180.00000000  |
| H | 6 | 1.08298321 | 5 | 120.02926753 | 4 | 180.00000000  |

$TS_{SA-SG}$ 

|   |   |            |   |              |   |               |
|---|---|------------|---|--------------|---|---------------|
| C |   |            |   |              |   |               |
| C | 1 | 1.40104489 |   |              |   |               |
| C | 2 | 1.39160780 | 1 | 120.31347838 |   |               |
| C | 3 | 1.39243763 | 2 | 120.35680491 | 1 | -1.49774436   |
| C | 4 | 1.39396563 | 3 | 119.63618810 | 2 | 0.82347325    |
| C | 5 | 1.39121472 | 4 | 120.13555386 | 3 | 0.28628172    |
| S | 1 | 1.76463943 | 6 | 118.96321105 | 5 | -178.85208275 |
| H | 7 | 1.33852441 | 1 | 95.04739517  | 6 | -165.95269233 |
| O | 2 | 1.38741501 | 1 | 119.87710619 | 6 | 177.51589489  |
| H | 9 | 0.96490628 | 2 | 108.55162699 | 1 | 94.48709649   |
| H | 3 | 1.08229483 | 2 | 118.33482508 | 1 | 178.44704660  |
| H | 4 | 1.08153337 | 3 | 119.90895415 | 2 | -179.70167614 |
| H | 5 | 1.08178730 | 4 | 120.26648366 | 3 | 179.60605596  |
| H | 6 | 1.08288993 | 5 | 120.23707361 | 4 | 178.84319401  |

 $TS_{SG-SG}^h$ 

|   |   |            |   |              |   |               |
|---|---|------------|---|--------------|---|---------------|
| C |   |            |   |              |   |               |
| C | 1 | 1.40137386 |   |              |   |               |
| C | 2 | 1.39481269 | 1 | 119.63468892 |   |               |
| C | 3 | 1.38883801 | 2 | 120.87433975 | 1 | 0.00000000    |
| C | 4 | 1.39425142 | 3 | 119.79823522 | 2 | 0.00133753    |
| C | 5 | 1.38905634 | 4 | 119.59133365 | 3 | -0.00066981   |
| S | 1 | 1.77317735 | 6 | 115.25034841 | 5 | -179.99481633 |
| H | 7 | 1.33643743 | 1 | 100.27029378 | 6 | -179.98812089 |
| O | 2 | 1.36658325 | 1 | 124.43597937 | 6 | -179.99972132 |
| H | 9 | 0.96247139 | 2 | 109.84058186 | 1 | -0.02883810   |
| H | 3 | 1.08200843 | 2 | 117.73806701 | 1 | 180.00000000  |
| H | 4 | 1.08148450 | 3 | 119.66617000 | 2 | -179.99968927 |
| H | 5 | 1.08128058 | 4 | 120.66363505 | 3 | 179.99875362  |
| H | 6 | 1.08345186 | 5 | 120.08446533 | 4 | 179.99971339  |

$TS_{AA-SA}$ 

|   |   |            |   |              |   |               |
|---|---|------------|---|--------------|---|---------------|
| C |   |            |   |              |   |               |
| C | 1 | 1.40176486 |   |              |   |               |
| C | 2 | 1.39619527 | 1 | 119.67798887 |   |               |
| C | 3 | 1.39110401 | 2 | 120.60602856 | 1 | 0.10805887    |
| C | 4 | 1.39316440 | 3 | 120.01205316 | 2 | -0.26091721   |
| C | 5 | 1.39169310 | 4 | 119.46201415 | 3 | -0.33612590   |
| S | 1 | 1.78277276 | 6 | 120.49285864 | 5 | -178.86879832 |
| H | 7 | 1.33897196 | 1 | 95.84680220  | 6 | -77.45821932  |
| O | 2 | 1.36386511 | 1 | 118.34543222 | 6 | -179.62209291 |
| H | 9 | 0.96480198 | 2 | 108.23986864 | 1 | 179.40111743  |
| H | 3 | 1.08461058 | 2 | 119.30330959 | 1 | 179.90255266  |
| H | 4 | 1.08189342 | 3 | 119.51634778 | 2 | 179.95357405  |
| H | 5 | 1.08135867 | 4 | 120.45731349 | 3 | -179.69721987 |
| H | 6 | 1.08213877 | 5 | 120.66386528 | 4 | -178.80221971 |

 $TS_{AA-SG}$ 

|   |   |            |   |              |   |               |
|---|---|------------|---|--------------|---|---------------|
| C |   |            |   |              |   |               |
| C | 1 | 1.39930977 |   |              |   |               |
| C | 2 | 1.39067883 | 1 | 120.58846082 |   |               |
| C | 3 | 1.39297748 | 2 | 120.07676714 | 1 | -0.78655019   |
| C | 4 | 1.39393711 | 3 | 119.67022224 | 2 | 0.57002436    |
| C | 5 | 1.39222212 | 4 | 120.29850269 | 3 | -0.00708633   |
| S | 1 | 1.76602318 | 6 | 123.98540210 | 5 | -179.90702889 |
| H | 7 | 1.33846484 | 1 | 94.79154708  | 6 | 5.33908112    |
| O | 2 | 1.38513251 | 1 | 118.61242756 | 6 | 176.94318507  |
| H | 9 | 0.96458839 | 2 | 108.92523008 | 1 | 97.26129543   |
| H | 3 | 1.08225893 | 2 | 118.52865329 | 1 | 178.79361138  |
| H | 4 | 1.08150941 | 3 | 119.96004892 | 2 | -179.88561147 |
| H | 5 | 1.08189412 | 4 | 120.22335258 | 3 | 179.68523341  |
| H | 6 | 1.08281812 | 5 | 119.98622154 | 4 | 179.55155454  |

SGw-TL-O

|   |    |            |   |              |   |               |
|---|----|------------|---|--------------|---|---------------|
| C |    |            |   |              |   |               |
| C | 1  | 1.40134124 |   |              |   |               |
| C | 2  | 1.39408124 | 1 | 120.14310797 |   |               |
| C | 3  | 1.39076574 | 2 | 119.45142221 | 1 | 0.49650764    |
| C | 4  | 1.39562110 | 3 | 120.79126250 | 2 | 0.13646165    |
| C | 5  | 1.39100317 | 4 | 119.69842357 | 3 | -0.20063121   |
| S | 1  | 1.78347141 | 6 | 121.23492717 | 5 | 178.03978810  |
| H | 7  | 1.34135959 | 1 | 96.85931660  | 6 | 95.25135542   |
| O | 2  | 1.36510837 | 1 | 121.43070905 | 6 | 179.35355490  |
| H | 9  | 0.97451573 | 2 | 106.67574621 | 1 | -3.02862343   |
| H | 3  | 1.08244058 | 2 | 118.93605712 | 1 | -179.58291889 |
| H | 4  | 1.08194624 | 3 | 119.17729901 | 2 | 179.97571470  |
| H | 5  | 1.08140336 | 4 | 120.37158669 | 3 | 179.68359160  |
| H | 6  | 1.08198633 | 5 | 121.03919342 | 4 | 179.76871360  |
| O | 9  | 2.89351590 | 2 | 109.70200504 | 1 | 176.34542538  |
| H | 15 | 0.96737533 | 9 | 14.30614567  | 2 | 171.89443545  |
| H | 15 | 0.96084567 | 9 | 116.50683108 | 2 | 135.57254518  |

SAw-TL-O

|   |    |            |   |              |   |               |
|---|----|------------|---|--------------|---|---------------|
| C |    |            |   |              |   |               |
| C | 1  | 1.40255865 |   |              |   |               |
| C | 2  | 1.39533984 | 1 | 119.73987231 |   |               |
| C | 3  | 1.39295062 | 2 | 120.49712821 | 1 | 0.00000000    |
| C | 4  | 1.39316837 | 3 | 119.94164248 | 2 | 0.00000000    |
| C | 5  | 1.39204501 | 4 | 119.70354173 | 3 | 0.00000000    |
| S | 1  | 1.76489955 | 6 | 119.02955656 | 5 | 180.00000000  |
| H | 7  | 1.33768147 | 1 | 95.29784895  | 6 | 179.99766017  |
| O | 2  | 1.36307534 | 1 | 117.77153206 | 6 | 179.99971498  |
| H | 9  | 0.97485522 | 2 | 109.44934403 | 1 | -179.99879804 |
| H | 3  | 1.08337475 | 2 | 118.87115115 | 1 | -179.99971282 |
| H | 4  | 1.08190127 | 3 | 119.58700360 | 2 | -180.00000000 |
| H | 5  | 1.08158977 | 4 | 120.48921576 | 3 | -180.00000000 |
| H | 6  | 1.08326666 | 5 | 120.22516748 | 4 | -180.00000000 |
| O | 9  | 2.80605723 | 2 | 112.04342038 | 1 | -179.98595759 |
| H | 15 | 0.96272151 | 9 | 115.83404393 | 2 | -118.28377519 |
| H | 15 | 0.96272362 | 9 | 115.77952139 | 2 | 118.24011388  |

## AAw-TL-O

|   |    |            |   |              |   |               |
|---|----|------------|---|--------------|---|---------------|
| C |    |            |   |              |   |               |
| C | 1  | 1.40194395 |   |              |   |               |
| C | 2  | 1.39462025 | 1 | 119.98710693 |   |               |
| C | 3  | 1.39340097 | 2 | 120.25438339 | 1 | -0.00034260   |
| C | 4  | 1.39296680 | 3 | 119.97537862 | 2 | 0.00028973    |
| C | 5  | 1.39326483 | 4 | 119.83951254 | 3 | 0.00000000    |
| S | 1  | 1.76797769 | 6 | 123.91434069 | 5 | -180.00000000 |
| H | 7  | 1.33844703 | 1 | 94.68637319  | 6 | 0.00000000    |
| O | 2  | 1.35987771 | 1 | 116.73509744 | 6 | 179.99961869  |
| H | 9  | 0.97467075 | 2 | 109.61546072 | 1 | 179.99399585  |
| H | 3  | 1.08332827 | 2 | 118.96003597 | 1 | 179.99935007  |
| H | 4  | 1.08189766 | 3 | 119.63248444 | 2 | -180.00000000 |
| H | 5  | 1.08167313 | 4 | 120.46146088 | 3 | 180.00000000  |
| H | 6  | 1.08314835 | 5 | 119.98149228 | 4 | 180.00000000  |
| O | 9  | 2.80923205 | 2 | 112.22045208 | 1 | 179.99758505  |
| H | 15 | 0.96279837 | 9 | 114.13195724 | 2 | -119.72682658 |
| H | 15 | 0.96279904 | 9 | 114.10448219 | 2 | 119.75059709  |

## SGw-TL-S

|   |    |            |   |              |   |               |
|---|----|------------|---|--------------|---|---------------|
| C |    |            |   |              |   |               |
| C | 1  | 1.40298489 |   |              |   |               |
| C | 2  | 1.39483974 | 1 | 119.36373441 |   |               |
| C | 3  | 1.38983462 | 2 | 120.03576708 | 1 | 0.27026819    |
| C | 4  | 1.39552550 | 3 | 120.58603738 | 2 | 0.16063892    |
| C | 5  | 1.39103927 | 4 | 119.83085263 | 3 | -0.10082899   |
| S | 1  | 1.78592755 | 6 | 121.17909247 | 5 | 178.12856744  |
| H | 7  | 1.34168403 | 1 | 97.25782323  | 6 | 93.15111757   |
| O | 2  | 1.35806483 | 1 | 122.61141673 | 6 | 179.66406277  |
| H | 9  | 0.97210739 | 2 | 107.04313529 | 1 | -3.25775815   |
| H | 3  | 1.08180537 | 2 | 118.53352137 | 1 | -179.81187882 |
| H | 4  | 1.08206447 | 3 | 119.31941284 | 2 | 179.97715926  |
| H | 5  | 1.08133863 | 4 | 120.40292417 | 3 | 179.78339425  |
| H | 6  | 1.08237332 | 5 | 120.83086180 | 4 | 179.65571604  |
| O | 7  | 3.41828253 | 1 | 91.70723473  | 6 | 0.51562031    |
| H | 15 | 0.96646919 | 7 | 17.29144042  | 1 | -153.78265236 |
| H | 15 | 0.96161280 | 7 | 120.78290639 | 1 | -131.53613737 |

## SAw-TL-S

|   |    |            |   |              |   |               |
|---|----|------------|---|--------------|---|---------------|
| C |    |            |   |              |   |               |
| C | 1  | 1.39950971 |   |              |   |               |
| C | 2  | 1.39234184 | 1 | 119.96468937 |   |               |
| C | 3  | 1.39273795 | 2 | 120.34055278 | 1 | 0.35549325    |
| C | 4  | 1.39284057 | 3 | 119.86409375 | 2 | -0.48752835   |
| C | 5  | 1.39182904 | 4 | 119.94352670 | 3 | -0.00162381   |
| S | 1  | 1.76915267 | 6 | 119.02517274 | 5 | 178.03677978  |
| H | 7  | 1.33826746 | 1 | 95.94337438  | 6 | 163.29373467  |
| O | 2  | 1.37087362 | 1 | 117.44386693 | 6 | -179.40128571 |
| H | 9  | 0.96458027 | 2 | 108.53113429 | 1 | 179.00859518  |
| H | 3  | 1.08458342 | 2 | 119.34202725 | 1 | -179.86959988 |
| H | 4  | 1.08157045 | 3 | 119.59341573 | 2 | 179.88966564  |
| H | 5  | 1.08124031 | 4 | 120.39762038 | 3 | -179.21176329 |
| H | 6  | 1.08262294 | 5 | 120.36299766 | 4 | -178.00797059 |
| O | 6  | 3.31559697 | 5 | 129.14569330 | 4 | -120.79206938 |
| H | 15 | 0.96711462 | 6 | 64.09083587  | 5 | 145.86768006  |
| H | 15 | 0.96157584 | 6 | 163.94438982 | 5 | -168.86890740 |

## AAw-TL-S

|   |    |            |   |              |   |               |
|---|----|------------|---|--------------|---|---------------|
| C |    |            |   |              |   |               |
| C | 1  | 1.40047077 |   |              |   |               |
| C | 2  | 1.39191117 | 1 | 120.43785719 |   |               |
| C | 3  | 1.39346179 | 2 | 120.24252057 | 1 | 0.00000000    |
| C | 4  | 1.39288561 | 3 | 119.66816395 | 2 | 0.00000000    |
| C | 5  | 1.39326260 | 4 | 120.12847051 | 3 | 0.00000000    |
| S | 1  | 1.76654844 | 6 | 123.48419188 | 5 | 180.00000000  |
| H | 7  | 1.34134708 | 1 | 94.56578184  | 6 | -0.00030397   |
| O | 2  | 1.36910537 | 1 | 116.55983872 | 6 | 180.00000000  |
| H | 9  | 0.96431600 | 2 | 108.69943380 | 1 | 179.99920726  |
| H | 3  | 1.08464580 | 2 | 119.35165930 | 1 | 180.00000000  |
| H | 4  | 1.08167870 | 3 | 119.72478182 | 2 | -180.00000000 |
| H | 5  | 1.08182557 | 4 | 120.27521982 | 3 | -180.00000000 |
| H | 6  | 1.08257657 | 5 | 120.41576306 | 4 | -180.00000000 |
| O | 6  | 3.51109102 | 5 | 139.67336654 | 4 | 179.99621627  |
| H | 15 | 0.96238454 | 6 | 126.54005025 | 5 | -79.74658266  |
| H | 15 | 0.96238425 | 6 | 126.55270559 | 5 | 79.74538369   |

## SGw-CY

|   |    |            |   |              |   |               |
|---|----|------------|---|--------------|---|---------------|
| C |    |            |   |              |   |               |
| C | 1  | 1.40176141 |   |              |   |               |
| C | 2  | 1.39232506 | 1 | 120.25110086 |   |               |
| C | 3  | 1.39162830 | 2 | 119.71834762 | 1 | 0.87404314    |
| C | 4  | 1.39493602 | 3 | 120.42493522 | 2 | 0.22583552    |
| C | 5  | 1.39215313 | 4 | 119.80354860 | 3 | -0.78628986   |
| S | 1  | 1.78006049 | 6 | 121.27147508 | 5 | 178.33197881  |
| H | 7  | 1.34671970 | 1 | 95.32264249  | 6 | 113.41449650  |
| O | 2  | 1.36754010 | 1 | 121.32670396 | 6 | 179.83530973  |
| H | 9  | 0.97628246 | 2 | 106.05549476 | 1 | -14.01307473  |
| H | 3  | 1.08204024 | 2 | 118.83962033 | 1 | -179.85771627 |
| H | 4  | 1.08192597 | 3 | 119.44545517 | 2 | 179.78179618  |
| H | 5  | 1.08145029 | 4 | 120.28406757 | 3 | 179.63196228  |
| H | 6  | 1.08206456 | 5 | 120.91654393 | 4 | -179.14192092 |
| O | 9  | 2.91575635 | 2 | 94.28876541  | 1 | 64.84898350   |
| H | 15 | 0.96733882 | 9 | 25.72431287  | 2 | 105.00395294  |
| H | 15 | 0.96157598 | 9 | 126.62303584 | 2 | 67.86220566   |

## SAw-CY

|   |    |            |   |              |   |               |
|---|----|------------|---|--------------|---|---------------|
| C |    |            |   |              |   |               |
| C | 1  | 1.39912574 |   |              |   |               |
| C | 2  | 1.39139670 | 1 | 120.45197823 |   |               |
| C | 3  | 1.39235238 | 2 | 120.24738242 | 1 | -0.59264396   |
| C | 4  | 1.39296331 | 3 | 119.76585305 | 2 | 0.16352190    |
| C | 5  | 1.39154496 | 4 | 119.89288863 | 3 | 0.46950514    |
| S | 1  | 1.76674914 | 6 | 118.79319594 | 5 | -178.45691715 |
| H | 7  | 1.33817243 | 1 | 96.09995213  | 6 | -163.58797844 |
| O | 2  | 1.37650381 | 1 | 117.35185398 | 6 | -179.37440516 |
| H | 9  | 0.96563008 | 2 | 108.61563884 | 1 | -176.51781100 |
| H | 3  | 1.08445086 | 2 | 119.40080651 | 1 | 179.98420139  |
| H | 4  | 1.08136353 | 3 | 119.65109062 | 2 | -179.75868646 |
| H | 5  | 1.08133488 | 4 | 120.35546654 | 3 | 179.91767953  |
| H | 6  | 1.08290985 | 5 | 120.30283645 | 4 | 178.93038864  |
| O | 9  | 3.01238669 | 2 | 102.18342191 | 1 | 68.04272065   |
| H | 15 | 0.96538789 | 9 | 4.75947989   | 2 | -155.78592388 |
| H | 15 | 0.96246151 | 9 | 101.97020661 | 2 | -54.13033709  |



## AAw-CY

|   |    |            |   |              |   |               |
|---|----|------------|---|--------------|---|---------------|
| C |    |            |   |              |   |               |
| C | 1  | 1.39891386 |   |              |   |               |
| C | 2  | 1.39037722 | 1 | 120.71278954 |   |               |
| C | 3  | 1.39283828 | 2 | 120.02744992 | 1 | 0.05976347    |
| C | 4  | 1.39276545 | 3 | 119.76801323 | 2 | -0.17847761   |
| C | 5  | 1.39257020 | 4 | 120.04622102 | 3 | 0.23597927    |
| S | 1  | 1.76840467 | 6 | 123.86829656 | 5 | 179.54879706  |
| H | 7  | 1.33814585 | 1 | 94.79020852  | 6 | 5.38178939    |
| O | 2  | 1.37426377 | 1 | 116.36043762 | 6 | -179.61225895 |
| H | 9  | 0.96551977 | 2 | 108.99076360 | 1 | -177.25661464 |
| H | 3  | 1.08422166 | 2 | 119.46504927 | 1 | -179.63674300 |
| H | 4  | 1.08133548 | 3 | 119.70449431 | 2 | -179.95622022 |
| H | 5  | 1.08143763 | 4 | 120.33047702 | 3 | -179.85921749 |
| H | 6  | 1.08284324 | 5 | 119.98826792 | 4 | 179.64186003  |
| O | 9  | 2.98825628 | 2 | 104.62661468 | 1 | 71.08081227   |
| H | 15 | 0.96590529 | 9 | 7.98999341   | 2 | -119.97727964 |
| H | 15 | 0.96172812 | 9 | 107.70161017 | 2 | -63.82083444  |

## SGw-PI

|   |    |            |   |              |   |               |
|---|----|------------|---|--------------|---|---------------|
| C |    |            |   |              |   |               |
| C | 1  | 1.40350219 |   |              |   |               |
| C | 2  | 1.39593280 | 1 | 119.57252743 |   |               |
| C | 3  | 1.39055976 | 2 | 120.06743046 | 1 | 0.66354952    |
| C | 4  | 1.39666985 | 3 | 120.54295267 | 2 | 0.12184984    |
| C | 5  | 1.39260069 | 4 | 119.57719639 | 3 | -0.43109232   |
| S | 1  | 1.78233156 | 6 | 121.01980212 | 5 | 176.80758837  |
| H | 7  | 1.34153842 | 1 | 96.53375576  | 6 | 98.41592426   |
| O | 2  | 1.35504879 | 1 | 122.22612763 | 6 | 178.68311183  |
| H | 9  | 0.97404595 | 2 | 106.66033703 | 1 | -4.19157847   |
| H | 3  | 1.08205525 | 2 | 118.60554264 | 1 | -179.70260573 |
| H | 4  | 1.08192618 | 3 | 119.40603970 | 2 | 179.60820592  |
| H | 5  | 1.08129683 | 4 | 120.41003615 | 3 | 179.43881665  |
| H | 6  | 1.08207168 | 5 | 120.92012073 | 4 | 179.53636028  |
| O | 6  | 3.43553020 | 5 | 81.53285914  | 4 | 72.35988670   |
| H | 15 | 0.96496623 | 6 | 19.20491386  | 5 | -1.95598245   |
| H | 15 | 0.96182257 | 6 | 107.87705250 | 5 | -81.55934220  |

## SAw-PI

|   |    |            |   |              |   |               |
|---|----|------------|---|--------------|---|---------------|
| C |    |            |   |              |   |               |
| C | 1  | 1.40099776 |   |              |   |               |
| C | 2  | 1.39243591 | 1 | 120.07804902 |   |               |
| C | 3  | 1.39286998 | 2 | 120.45761850 | 1 | -0.27952109   |
| C | 4  | 1.39391798 | 3 | 119.79466760 | 2 | 0.61482479    |
| C | 5  | 1.39244037 | 4 | 119.80021254 | 3 | -0.25859377   |
| S | 1  | 1.76405839 | 6 | 118.84995236 | 5 | -176.58704444 |
| H | 7  | 1.33783028 | 1 | 95.67441556  | 6 | -178.45336403 |
| O | 2  | 1.36785310 | 1 | 117.32613234 | 6 | -179.56903387 |
| H | 9  | 0.96477303 | 2 | 108.80494300 | 1 | 175.07019679  |
| H | 3  | 1.08434051 | 2 | 119.29408927 | 1 | -179.46742082 |
| H | 4  | 1.08144213 | 3 | 119.66618053 | 2 | -179.42025403 |
| H | 5  | 1.08139114 | 4 | 120.41348407 | 3 | 179.85087849  |
| H | 6  | 1.08319459 | 5 | 120.23655444 | 4 | -179.43470480 |
| O | 1  | 3.25446289 | 6 | 86.27524981  | 5 | -78.95879569  |
| H | 15 | 0.96412910 | 1 | 51.42505283  | 6 | 37.28987685   |
| H | 15 | 0.96359163 | 1 | 53.88164794  | 6 | -122.49547760 |

## AAw-PI

|   |    |            |   |              |   |               |
|---|----|------------|---|--------------|---|---------------|
| C |    |            |   |              |   |               |
| C | 1  | 1.40083449 |   |              |   |               |
| C | 2  | 1.39181846 | 1 | 120.30229011 |   |               |
| C | 3  | 1.39334068 | 2 | 120.19714756 | 1 | -0.06976820   |
| C | 4  | 1.39336667 | 3 | 119.85277791 | 2 | 0.36442292    |
| C | 5  | 1.39345756 | 4 | 119.95360618 | 3 | -0.22845434   |
| S | 1  | 1.76754803 | 6 | 124.00347361 | 5 | -176.99164259 |
| H | 7  | 1.33872559 | 1 | 94.67006208  | 6 | 0.94205693    |
| O | 2  | 1.36526696 | 1 | 116.21787583 | 6 | -179.53568265 |
| H | 9  | 0.96473144 | 2 | 109.16527114 | 1 | 175.22148388  |
| H | 3  | 1.08415366 | 2 | 119.38444175 | 1 | -179.48686111 |
| H | 4  | 1.08140341 | 3 | 119.67987256 | 2 | -179.59589000 |
| H | 5  | 1.08142504 | 4 | 120.39057247 | 3 | 179.96626971  |
| H | 6  | 1.08291737 | 5 | 120.00979576 | 4 | -179.38098986 |
| O | 1  | 3.22199424 | 6 | 90.75859924  | 5 | -85.19331353  |
| H | 15 | 0.96362319 | 1 | 47.93130178  | 6 | 38.46304076   |
| H | 15 | 0.96435195 | 1 | 55.25563673  | 6 | -134.37125609 |

## SG-SA-w

|   |    |            |   |              |   |               |
|---|----|------------|---|--------------|---|---------------|
| C |    |            |   |              |   |               |
| C | 1  | 1.40557957 |   |              |   |               |
| C | 2  | 1.39510902 | 1 | 118.95525123 |   |               |
| C | 3  | 1.39136706 | 2 | 120.88133997 | 1 | -2.10798941   |
| C | 4  | 1.39404019 | 3 | 120.01255932 | 2 | 0.22225229    |
| C | 5  | 1.39126107 | 4 | 119.69584228 | 3 | 1.37727474    |
| S | 1  | 1.77542238 | 6 | 118.19224450 | 5 | 179.35247710  |
| H | 7  | 1.34141392 | 1 | 95.65839678  | 6 | -148.37413768 |
| O | 2  | 1.36455489 | 1 | 122.54304359 | 6 | 178.83304585  |
| H | 9  | 0.98097485 | 2 | 109.22097947 | 1 | 53.25061174   |
| H | 3  | 1.08211559 | 2 | 117.75374790 | 1 | 178.67393364  |
| H | 4  | 1.08186406 | 3 | 119.69778653 | 2 | -179.51668645 |
| H | 5  | 1.08159959 | 4 | 120.49738442 | 3 | -179.91374119 |
| H | 6  | 1.08280396 | 5 | 120.45463434 | 4 | 177.38552851  |
| O | 9  | 2.76721620 | 2 | 105.21031590 | 1 | 53.95309654   |
| H | 15 | 0.96989788 | 9 | 93.89323700  | 2 | -41.57145578  |
| H | 15 | 0.96259920 | 9 | 118.48041310 | 2 | 68.61096221   |

## SG-AA-w

|   |    |            |   |              |   |               |
|---|----|------------|---|--------------|---|---------------|
| C |    |            |   |              |   |               |
| C | 1  | 1.40419292 |   |              |   |               |
| C | 2  | 1.39450437 | 1 | 119.20066480 |   |               |
| C | 3  | 1.39149169 | 2 | 120.79674781 | 1 | -1.16090602   |
| C | 4  | 1.39394033 | 3 | 119.88900597 | 2 | -0.34040114   |
| C | 5  | 1.39171848 | 4 | 119.86220816 | 3 | 1.11866036    |
| S | 1  | 1.77590345 | 6 | 122.34783080 | 5 | 176.29259308  |
| H | 7  | 1.33809723 | 1 | 95.29024312  | 6 | 12.86417915   |
| O | 2  | 1.36524136 | 1 | 121.97124676 | 6 | 178.63576378  |
| H | 9  | 0.98033385 | 2 | 109.50628841 | 1 | 54.80753160   |
| H | 3  | 1.08207053 | 2 | 117.74417357 | 1 | 179.12770861  |
| H | 4  | 1.08174708 | 3 | 119.81427056 | 2 | -179.89608174 |
| H | 5  | 1.08171366 | 4 | 120.49968217 | 3 | -179.60572327 |
| H | 6  | 1.08311801 | 5 | 120.00096905 | 4 | 178.30592853  |
| O | 9  | 2.77269295 | 2 | 105.11810503 | 1 | 55.65158807   |
| H | 15 | 0.96867050 | 9 | 94.56464418  | 2 | -46.76423589  |
| H | 15 | 0.96258176 | 9 | 116.96203387 | 2 | 63.18268836   |

Table S 1: Enthalpies of formation ( $\Delta H_{298.15K}^\theta$ ),  $T\Delta S$ , Gibbs free energies of formation ( $\Delta G_{298.15K}^\theta$ ) in  $\text{kJ mol}^{-1}$  of the complexes and equilibrium constants ( $K_{eq}$ ) at 298.15 K obtained from MP2/aug-cc-pVTZ method.

| Complex  | $\Delta H_{298.15K}^\theta$ | $T\Delta S$ | $\Delta G_{298.15K}^\theta$ | $K_{eq}$                |
|----------|-----------------------------|-------------|-----------------------------|-------------------------|
| SGw-TL-O | -16.21                      | -37.18      | 20.97                       | $2.119 \times 10^{-4}$  |
| SAw-TL-O | -18.95                      | -35.58      | 16.63                       | $12.205 \times 10^{-4}$ |
| AAw-TL-O | -13.94                      | -36.05      | 22.11                       | $1.338 \times 10^{-4}$  |
| SGw-TL-S | -11.04                      | -36.21      | 25.17                       | $0.389 \times 10^{-4}$  |
| SAw-TL-S | -3.12                       | -35.14      | 32.02                       | $0.025 \times 10^{-4}$  |
| AAw-TL-S | 1.24                        | -32.71      | 33.95                       | $0.011 \times 10^{-4}$  |
| SGw-CY   | -20.77                      | -38.69      | 17.92                       | $7.253 \times 10^{-4}$  |
| SAw-CY   | -5.96                       | -36.78      | 30.83                       | $0.040 \times 10^{-4}$  |
| AAw-CY   | -2.47                       | -36.05      | 33.58                       | $0.013 \times 10^{-4}$  |
| SGw-PI   | -12.51                      | -33.98      | 21.46                       | $1.739 \times 10^{-4}$  |
| SAw-PI   | -6.71                       | -34.10      | 27.39                       | $0.159 \times 10^{-4}$  |
| AAw-PI   | -2.45                       | -34.91      | 32.46                       | $0.021 \times 10^{-4}$  |
| SG-SA-w  | -19.25                      | -40.17      | 20.92                       | $2.163 \times 10^{-4}$  |
| SG-AA-w  | -13.49                      | -39.11      | 25.61                       | $0.326 \times 10^{-4}$  |

Table S 2: Interaction energies ( $\text{kJ mol}^{-1}$ ) of 2-hydroxy thiophenol-water complexes calculated by different DFT methods using aug-cc-pVTZ basis set.

| Complex  | wB97XD    |           | M06-2X    |           | B3LYP-D3  |           |
|----------|-----------|-----------|-----------|-----------|-----------|-----------|
|          | $E_{int}$ | $E_{def}$ | $E_{int}$ | $E_{def}$ | $E_{int}$ | $E_{def}$ |
| SGw-TL-O | -12.12    | 0.40      | -13.45    | 0.43      | -14.49    | 0.41      |
| SAw-TL-O | -23.02    | 0.67      | -25.59    | 0.52      | -24.80    | 0.59      |
| AAw-TL-O | -23.13    | 0.62      | -24.48    | 0.49      | -24.24    | 0.56      |
| SGw-TL-S | -8.86     | 0.25      | -10.29    | 0.26      | -10.80    | 0.25      |
| SAw-TL-S | -8.18     | 1.30      | -10.37    | 1.14      | -9.92     | 1.37      |
| AAw-TL-S | -8.95     | 0.10      | -8.56     | 0.12      | -10.42    | 0.08      |
| SGw-CY   | -14.20    | 1.90      | -16.78    | 1.38      | -16.61    | 1.91      |
| SAw-CY   | -10.85    | 0.97      | -12.00    | 0.76      | -12.67    | 1.01      |
| AAw-CY   | -11.61    | 0.45      | -12.73    | 0.39      | -13.84    | 0.43      |
| SGw-PI   | -10.24    | 0.15      | -9.87     | 0.20      | -10.63    | 0.15      |
| SAw-PI   | -11.72    | 0.44      | -13.71    | 0.76      | -12.42    | 0.41      |
| AAw-PI   | -12.22    | 0.39      | -11.97    | 0.66      | -12.67    | 0.36      |
| SG-SA-w  | -13.79    | 13.94     | -17.67    | 13.27     | -16.95    | 13.65     |
| SG-AA-w  | -7.59     | 20.56     | -12.09    | 18.32     | -10.86    | 19.00     |

Table S 3: Calculated SAPT decomposition of interaction energy ( $\text{kJ mol}^{-1}$ ) for various complexes obtained at the sSAPT0/aug-cc-pVDZ level.

| Complex  | $E_{elst}$ | $E_{exch}$ | $E_{ind}$ | $E_{disp}$ | $E_{int}^{sSAPT0}$ | CT    |
|----------|------------|------------|-----------|------------|--------------------|-------|
| SGw-TL-O | -35.02     | 29.02      | -7.65     | -7.81      | -21.46             | -1.97 |
| SAw-TL-O | -56.98     | 43.78      | -13.89    | -7.10      | -34.19             | -5.04 |
| AAw-TL-O | -56.34     | 43.29      | -13.57    | -6.97      | -33.59             | -5.01 |
| SGw-TL-S | -26.39     | 27.98      | -8.00     | -7.23      | -13.65             | -2.06 |
| SAw-TL-S | -23.50     | 25.33      | -7.82     | -7.54      | -13.54             | -1.92 |
| AAw-TL-S | -25.92     | 25.77      | -10.14    | -5.45      | -15.73             | -1.15 |
| SGw-CY   | -41.60     | 39.55      | -11.10    | -10.67     | -23.82             | -2.23 |
| SAw-CY   | -29.22     | 24.83      | -5.69     | -8.41      | -18.48             | -1.48 |
| AAw-CY   | -30.27     | 23.97      | -5.68     | -7.78      | -19.76             | -1.61 |
| SGw-PI   | -14.75     | 18.39      | -5.47     | -9.84      | -11.67             | -0.86 |
| SAw-PI   | -17.96     | 18.09      | -5.17     | -10.25     | -15.29             | -0.45 |
| AAw-PI   | -18.73     | 18.34      | -5.32     | -10.11     | -15.83             | -0.47 |
| SG-SA-w  | -80.30     | 79.49      | -20.56    | -12.92     | -34.28             | -8.22 |
| SG-AA-w  | -75.56     | 76.03      | -19.39    | -12.08     | -31.00             | -7.80 |

Table S 4: Calculated SAPT decomposition of interaction energy ( $\text{kJ mol}^{-1}$ ) for various complexes obtained at the SAPT2+/aug-cc-pVDZ level.

| Complex  | $E_{elst}$ | $E_{exch}$ | $E_{ind}$ | $E_{disp}$ | $E_{int}^{SAPT2+}$ | CT    |
|----------|------------|------------|-----------|------------|--------------------|-------|
| SGw-TL-O | -32.88     | 37.42      | -10.13    | -12.73     | -18.33             | -2.73 |
| SAw-TL-O | -50.87     | 51.76      | -16.77    | -13.13     | -29.01             | -5.05 |
| AAw-TL-O | -50.56     | 51.35      | -16.34    | -12.92     | -28.47             | -5.07 |
| SGw-TL-S | -23.94     | 32.01      | -9.19     | -12.09     | -13.23             | -2.14 |
| SAw-TL-S | -20.98     | 28.63      | -9.01     | -12.13     | -13.49             | -1.88 |
| AAw-TL-S | -22.77     | 26.35      | -7.69     | -9.87      | -13.99             | -1.69 |
| SGw-CY   | -40.51     | 46.23      | -11.53    | -17.77     | -23.57             | -3.05 |
| SAw-CY   | -28.31     | 33.01      | -8.18     | -13.86     | -17.34             | -2.03 |
| AAw-CY   | -27.93     | 31.34      | -8.04     | -12.85     | -17.48             | -2.15 |
| SGw-PI   | -14.79     | 22.92      | -7.13     | -14.32     | -13.32             | -0.99 |
| SAw-PI   | -18.33     | 23.45      | -6.58     | -15.45     | -16.91             | -0.81 |
| AAw-PI   | -19.00     | 23.83      | -6.64     | -15.35     | -17.17             | -0.84 |
| SG-SA-w  | -78.73     | 94.92      | -26.57    | -22.36     | -32.73             | -8.37 |
| SG-AA-w  | -73.83     | 89.66      | -24.68    | -21.27     | -30.11             | -7.92 |

Table S 5: Difference in NBO charges ( $\Delta q$ ) of selected atoms of the complexes from the respective monomers.

| Complex  | $\Delta q$ (S7) | $\Delta q$ (H8) | $\Delta q$ (O9) | $\Delta q$ (H10) |
|----------|-----------------|-----------------|-----------------|------------------|
| SGw-TL-O | 0.000           | 0.002           | -0.031          | 0.008            |
| SAw-TL-O | -0.012          | 0.002           | -0.036          | 0.036            |
| AAw-TL-O | -0.007          | -0.003          | -0.036          | 0.036            |
| SGw-TL-S | -0.023          | 0.008           | 0.001           | -0.001           |
| SAw-TL-S | -0.019          | 0.001           | 0.000           | 0.000            |
| AAw-TL-S | -0.037          | 0.037           | 0.000           | -0.003           |
| SGw-CY   | -0.023          | 0.047           | -0.024          | 0.005            |
| SAw-CY   | -0.001          | -0.006          | -0.015          | 0.007            |
| AAw-CY   | -0.012          | 0.007           | -0.019          | 0.008            |
| SGw-PI   | 0.013           | 0.000           | 0.001           | 0.002            |
| SAw-PI   | -0.002          | 0.004           | 0.002           | 0.003            |
| AAw-PI   | -0.002          | 0.003           | 0.001           | 0.004            |
| SG-SA-w  | 0.002           | 0.019           | -0.045          | 0.030            |
| SG-AA-w  | 0.030           | -0.007          | -0.041          | 0.029            |
